# Supplementary material
Source: Elsevier journal article supplement (https://www.sciencedirect.com/science/article/pii/S0025775321003201)
Supplement: mmc1 [file S0025775321003201:mmc1.doc]

**Table S1. Clinical characteristics of COVID-19 patients with 0, 1, 2, 3, 4-5 components of the metabolic syndrome.**

| **Variables (n [%] or median [IQR])** | **None component of MS (n=22)** | **1 components of MS (n=80)** | **2 components of MS (n=86)** | **3 components of MS (n=38)** | **4-5 components of MS (n=7)** |
| --- | --- | --- | --- | --- | --- |
| Age (ys) | 36.5 (31.8, 45.8) | 41.0 (31.0, 50.0) | 49.0 (39.0, 59.0) | 52.5 (44.0, 63.3) | 53.0 (39.0, 54.0) |
| Male | 11 (50.0) | 38 (47.5) | 52 (60.5) | 26 (68.4) | 5 (71.4) |
| **Onset signs** |  |  |  |  |  |
| Fever | 17 (77.3) | 56 (70.0) | 64 (74.4) | 25 (65.8) | 6 (85.7) |
| Cough | 15 (68.2) | 50 (62.5) | 53 (61.6) | 19 (50.0) | 6 (85.7) |
| WBC (×109/L) | 4.2 (3.3, 4.9) | 4.8 (3.7, 5.9) | 4.8 (3.8, 5.4) | 6.1 (4.0, 6.8) | 4.5 (3.1, 5.9) |
| Decreased | 9 (40.9) | 27 (33.8) | 24 (27.9) | 7 (18.4) | 3 (42.9) |
| Lymphocyte (×109/L) | 1.4 (1.1, 1.6) | 1.3 (1.0, 1.7) | 1.1 (0.8, 1.5) | 1.1 (0.8, 1.6) | 1.2 (1.0, 1.6) |
| Decreased | 1 (4.5) | 12 (15.0) | 35 (40.7) | 9 (23.7) | 1 (14.3) |
| **Chest CT** |  |  |  |  |  |
| Unilateral/Bilateral pneumonia | 21 (95.5) | 75 (93.8) | 83 (96.5) | 35 (92.1) | 7 (100.0) |
| **Complications** |  |  |  |  |  |
| Respiratory failure | 0 | 5 (6.3) | 4 (4.7) | 12 (31.6) | 1 (14.3) |
| ARDS | 0 | 0 | 0 | 3 (7.9) | 0 |
| **Outcome** |  |  |  |  |  |
| Severe illness | 0 | 6 (7.5) | 6 (7.0) | 14 (36.8) | 1 (14.3) |
| Critical illness | 0 | 0 | 1 (1.2) | 2 (5.3) | 0 |
| Admission to ICU | 0 | 5 (6.3) | 5 (5.8) | 8 (21.1) | 0 |

IQR, interquartile range; WBC, white blood cells; ARDS, acute respiratory distress syndrome; ICU, intensive care unit; MS, metabolic syndrome.
